# Supplementary material
Source: PubMed Central journal article supplement (PMC33302)
Supplement: pnas_091110098_1.pdf [file pnas_091110098_1.pdf]

**Table 3. mRNAs that are more abundant in wild-type infected and *phoP::Tn10* mutant infected macrophages**

| Clone ID*                    |                                                  | Ratio (SE)             | Ratio (SE)             |
|------------------------------|--------------------------------------------------|------------------------|------------------------|
| <b>Inflammatory</b>          |                                                  |                        |                        |
| 549933                       | IL-8, C-X-C chemokine                            | 3.1 <sup>†</sup> (1.2) | 2.3 <sup>‡</sup> (1.4) |
| 323238                       | GRO1, C-X-C chemokine <sup>§</sup>               | 7.0 (1.2)              | 8.6 (1.3)              |
| 324437                       | GRO1, C-X-C chemokine <sup>§</sup>               | 7.9 (1.3)              | 5.5 (1.6)              |
| 153340                       | GRO2, C-X-C chemokine                            | 7.2 (1.3)              | 6.5 (1.6)              |
| 460398                       | Mip-1-beta, C-C chemokine                        | 4.1 (1.3)              | 2.3 (1.9)              |
| 153355                       | C-C chemokine A3-like 1                          | 2.5 (1.5)              |                        |
| 768497                       | C-C chemokine, member 18                         | 2.1 (1.4)              |                        |
| 205633                       | Mip-1-beta, C-C chemokine                        | 7.8 (1.5)              | 3.9 (2.2)              |
| 324655                       | IL-1, beta cytokine <sup>§</sup>                 | 4.8 (1.3)              | 6.4 (1.5)              |
| 491763                       | IL-1, beta cytokine <sup>§</sup>                 | 4.3 (1.3)              | 3.5 (2.0)              |
| 84295                        | IL-1 receptor antagonist                         | 2.1 (1.3)              |                        |
| 768018                       | SGRF, IL-23 p19 subunit                          | 2.4 (1.2)              | 2.6 (1.6)              |
| 269815                       | Inhibin, beta A (activin A)                      | 3.5 (1.2)              | 4.4 (1.4)              |
| 845477                       | Prostaglandin-endoperoxide synthase 2            | 7.4 (1.3)              | 6.7 (1.5)              |
| 153025                       | Leukemia inhibitory factor                       | 3.1 (1.2)              |                        |
| 712604                       | Pre-B-cell colony-enhancing factor               | 3.0 (1.3)              |                        |
| 811028                       | Cathepsin D (lysosomal aspartyl protease)        | 2.7 (1.2)              |                        |
| 82879                        | Mannose-binding lectin (protein C) 2             | 2.0 (1.2)              |                        |
| 298268                       | B-cell translocation gene 1                      | 2.2 (1.2)              |                        |
| 47359                        | Endothelin 1                                     | 2.4 (1.2)              |                        |
| 70692                        | Plasminogen Activator Inhibitor, typeII          | 3.4 (1.2)              | 3.2 (1.5)              |
| 358531                       | Transcription factor AP-1 subunit (Jun)          | 3.0 (1.2)              | 2.1 (1.7)              |
| 295093                       | Transcription factor Spi-B                       | 3.1 (1.2)              | 2.1 (1.4)              |
| <b>Cell death/survival</b>   |                                                  |                        |                        |
| 362278                       | STAT induced STAT inhibitor 3 <sup>§</sup>       | 2.4 (1.3)              |                        |
| 84211                        | STAT induced STAT inhibitor 3 <sup>§</sup>       | 3.2 (1.3)              |                        |
| 340734                       | Nuclear factor NF-kappaB inhibitor               | 3.3 (1.3)              | 2.6 (1.7)              |
| 813630                       | PIM-1 serine/threonine kinase <sup>§</sup>       | 2.5 (1.2)              |                        |
| 292726                       | PIM-1 serine/threonine kinase <sup>§</sup>       | 2.0 (1.2)              |                        |
| 770670                       | A20                                              | 3.3 (1.2)              | 2.0 (1.7)              |
| 82225                        | Secreted frizzled-related protein 1              |                        | 4.2 (1.6)              |
| 155583                       | TNF receptor-associated factor 1 (TRAF1)         | 2.4 (1.2)              | 2.5 (1.4)              |
| 810724                       | PRG1 (GLY96,DIF2,IEX1)                           | 3.7 (1.3)              | 3.2 (1.6)              |
| <b>Extra-cellular matrix</b> |                                                  |                        |                        |
| 841666                       | Connexin 26 gap junction protein, 2 <sup>§</sup> | 6.0 (1.3)              | 4.0 (1.5)              |
| 210921                       | Connexin 26 gap junction protein, 2 <sup>§</sup> | 3.5 (1.2)              | 2.2 (1.9)              |
| 32609                        | Laminin, alpha 4                                 | 2.0 (1.2)              |                        |
| <b>Other</b>                 |                                                  |                        |                        |

|        |                                                    |           |           |
|--------|----------------------------------------------------|-----------|-----------|
| 78148  | Superoxide dismutase 2, mitochondrial <sup>§</sup> | 6.4 (1.2) | 6.2 (1.5) |
| 840708 | Superoxide dismutase 2, mitochondrial <sup>§</sup> | 6.7 (1.2) | 4.9 (1.6) |
| 82734  | Fatty-acid-Coenzyme A ligase                       | 2.5 (1.2) |           |
| 293032 | Transcription factor AP-2 alpha                    | 4.3 (1.3) | 3.4 (1.6) |
| 51448  | Activating transcription factor 3                  | 2.4 (1.2) |           |
| 814353 | PMA-induced protein 1                              | 5.6 (1.3) | 4.5 (1.5) |
| 140301 | cDNA FLJ11041 fis 4.1 (1.3)                        | 2.7 (1.6) |           |
| 246722 | Trinucleotide repeat containing 3 <sup>§</sup>     | 2.6 (1.2) | 2.8 (1.4) |
| 199367 | Trinucleotide repeat containing 3 <sup>§</sup>     | 2.7 (1.2) | 3.1 (1.5) |
| 487722 | Calmodulin 2 (phosphorylase kinase, delta)         | 2.2 (1.2) |           |
| 490551 | Progesterone membrane binding protein              | 2.1 (1.2) |           |
| 841281 | SSX4 protein gene, partial cds                     | 2.3 (1.2) |           |
| 278375 | 6-phosphofructo-2-kinase                           | 2.1 (1.2) |           |
| 767765 | GTP-binding protein                                | 2.1 (1.2) |           |
| 667883 | Pleckstrin homology-like domain                    | 2.2 (1.2) |           |
| 898123 | Formyltransferase                                  | 2.0 (1.2) |           |
| 510273 | Highly similar to BETA2 Human MEN1                 | 2.4 (1.3) |           |
| 840944 | Early growth response 1                            | 2.2 (1.3) |           |
| 510381 | B-cell derived transcription factor <sup>§</sup>   | 2.6 (1.3) |           |
| 360436 | B-cell derived transcription factor <sup>§</sup>   | 2.0 (1.3) | 2.0 (1.6) |
| 685626 | ATPase, plasma membrane 1                          |           | 2.2 (1.5) |
| 632074 | Potassium-chloride transporter                     | 2.0 (1.2) |           |
| 26507  | Similar to Mouse sox18                             | 2.6 (1.2) | 2.0 (1.4) |
| 731292 | Chromosome 21 open reading frame 50 <sup>§</sup>   | 2.6 (1.3) | 2.8 (1.5) |
| 502396 | Chromosome 21 open reading frame 50 <sup>§</sup>   | 2.5 (1.3) | 2.1 (1.5) |
| 282868 | Unknown                                            | 4.3 (1.3) | 3.1 (1.7) |
| 198011 | Unknown                                            |           | 2.3 (1.6) |
| 130826 | Unknown                                            | 5.1 (1.3) | 4.0 (1.6) |
| 784032 | Unknown                                            | 3.0 (1.2) |           |
| 730990 | Unknown                                            | 2.6 (1.3) |           |
| 843041 | Unknown                                            | 2.0 (1.2) |           |
| 289496 | Unknown                                            | 2.9 (1.3) |           |
| 346861 | Unknown                                            | 2.0 (1.2) |           |
| 742672 | Unknown                                            | 2.1 (1.2) |           |
| 80769  | Unknown                                            | 2.7 (1.4) |           |
| 220376 | Unknown                                            | 2.1 (1.4) |           |

\*The clone identification IMAGE number can be used to look up the gene at <http://genome-www4.stanford.edu/cgi-bin/SMD/source/sourceSearch>.

<sup>†</sup>Relative expression levels of wild-type infected macrophages and uninfected macrophages.

<sup>‡</sup>Relative expression levels of *phoP::Tn10* infected macrophages and uninfected macrophages.

<sup>§</sup>Two different cDNAs on the array represent the same gene.
